# Supplementary material
Source: HighWire-hosted journal article supplement (https://cmaj.ca/highwire/filestream/72013/field_highwire_adjunct_files/0/181072-what-1-at.pdf)
Supplement: 181072-what-1-at.pdf [file 181072-what-1-at.pdf]

**Appendix 1 (as supplied by the authors):** Differential diagnosis for peripheral eosinophilia with associated gastrointestinal symptoms

Note: Many of the disease entities listed below are most commonly asymptomatic, or may only present with some of the listed clinical manifestations. While this table aims to cover the more common clinical features, it is not a fully comprehensive list

| Disease                               | Clinical signs & symptoms                                                                                                                                                                                                                        |
|---------------------------------------|--------------------------------------------------------------------------------------------------------------------------------------------------------------------------------------------------------------------------------------------------|
| Infectious Etiologies – Parasites     |                                                                                                                                                                                                                                                  |
| Helminths                             |                                                                                                                                                                                                                                                  |
| Strongyloidiasis                      | Serpiginous rash (larva currens), relapsing respiratory symptoms (migratory stage - Loeffler syndrome), abdominal pain, diarrhea and weight loss; can cause a hyperinfection syndrome if untreated, particularly in setting of immunosuppression |
| Toxocariasis (visceral larva migrans) | Fever, anorexia, malaise, hepatitis, pneumonitis, pruritic urticarial skin lesions                                                                                                                                                               |
| Trichinellosis                        | Diarrhea, abdominal pain, vomiting, myalgias, muscle weakness                                                                                                                                                                                    |
| Anisakiasis                           | Acute epigastric pain and distention, vomiting, diarrhea; in severe cases, allergic reaction (bronchospasm, angioedema) or intestinal obstruction                                                                                                |
| Ascariasis                            | Respiratory symptoms (migratory stage - Loeffler syndrome) including dry cough, dyspnea, blood-tinged sputum; occasionally intestinal involvement causing nausea, vomiting, diarrhea and rarely intestinal obstruction                           |
| Dog/Cat Hookworm (Ancylostoma)        | Serpiginous pruritic rash at parasite penetration site                                                                                                                                                                                           |
| Flukes (Liver/Intestinal)             | Often asymptomatic, abdominal pain, fever, protein malabsorption occasionally leading to anasarca.                                                                                                                                               |
| Protozoa                              |                                                                                                                                                                                                                                                  |
| Cryptosporidiosis                     | Nausea, malaise, crampy abdominal pain, fever, watery stool; in immunosuppressed patients, can cause cholangitis, hepatitis, pancreatitis and biliary tract involvement                                                                          |
| Giardiasis                            | Diarrhea, malaise, steatorrhea, abdominal pain, weight loss; less commonly fever, vomiting, urticaria                                                                                                                                            |
| Non-Infectious Etiologies             |                                                                                                                                                                                                                                                  |
| Celiac disease                        | Abdominal pain, steatorrhea, flatulence, weight loss                                                                                                                                                                                             |
| Eosinophilic Esophagitis              | Dysphagia, odynophagia, food impaction, chest pain, epigastric pain                                                                                                                                                                              |
| Primary Eosinophilic Gastroenteritis  | Nausea, vomiting, diarrhea, dyspepsia, weight loss; rarely, obstructive type symptoms (eg. pyloric stenosis, intestinal obstruction) or ascites                                                                                                  |

|                                                              |                                                                                                                                                                                                                                                                                         |
|--------------------------------------------------------------|-----------------------------------------------------------------------------------------------------------------------------------------------------------------------------------------------------------------------------------------------------------------------------------------|
| Idiopathic Hypereosinophilic Syndrome                        | Multi-organ damage; skin rashes, shortness of breath, chest pain, memory loss, ataxia, weight loss, abdominal pain, diarrhea                                                                                                                                                            |
| Hepatobiliary, colon or gastric cancer                       | Abdominal pain, rectal bleeding, change in stool calibre, nausea/vomiting, dysphagia, ascites                                                                                                                                                                                           |
| Inflammatory Bowel Disease                                   | Abdominal pain, diarrhea, bloody stool, fistulas, various extra-intestinal manifestations (eg. arthralgias, uveitis, erythema nodosum, pyoderma gangrenosum, primary sclerosing cholangitis)                                                                                            |
| Polyarteritis Nodosa                                         | Fatigue, weight loss, weakness, fever, arthralgias, skin lesions, hypertension, abdominal pain, neurologic dysfunction, renal insufficiency                                                                                                                                             |
| Eosinophilic Granulomatosis with Polyangiitis                | Pulmonary symptoms most common, with asthma as the cardinal feature (>90% of patients). Fatigue, weight loss, fever, arthralgias, cough, dyspnea, rhinosinusitis, urinary abnormalities (eg. hematuria, proteinuria) with or without renal dysfunction, neurologic dysfunction, purpura |
| Carcinoid (neuroendocrine) tumour                            | Carcinoid syndrome, which may involve facial flushing, wheezing, diarrhea, abdominal cramping and/or peripheral edema; advanced small bowel disease may present with obstruction or ascites                                                                                             |
| Hematologic malignancy (lymphoma, myoproliferative neoplasm) | Fatigue, weakness, weight loss, night sweats, enlarged/tender lymph nodes, fever/chills, easy bleeding and bruising                                                                                                                                                                     |
| Drug-induced eosinophilia                                    | Ranges from asymptomatic to life threatening – rarely, DRESS (drug reaction with eosinophilia and systemic symptoms) including triad of skin eruption, fever, and organ involvement (kidneys, heart, liver, lung)                                                                       |
| Primary Biliary Cirrhosis                                    | Fatigue, pruritus, right upper quadrant pain, anorexia; hepatosplenomegaly, edema, jaundice, ascites, xanthomas in advanced disease                                                                                                                                                     |
| Primary Sclerosing Cholangitis                               | Fatigue, pruritus, right upper quadrant pain, fever, chills, night sweats, jaundice, ascites in advanced disease; diarrhea in those with inflammatory bowel disease                                                                                                                     |
| Eosinophilic Cholangitis                                     | Right upper quadrant pain, jaundice, pruritus, pale stool, dark urine, anorexia, nausea                                                                                                                                                                                                 |
| Eosinophilic Cholecystitis (Hepatic Transplant Rejection)    | Fever, malaise, abdominal pain, hepatosplenomegaly; rarely, increasing ascites                                                                                                                                                                                                          |

## References

1. Butt N, Lambert J, Ali S, et al. Guideline for the investigation and management of eosinophilia. *Br J of Haematol.* 2017; 176(4): 553-572.
2. Walker M, Potter M, Talley N. Eosinophilic gastroenteritis and other eosinophilic gut diseases distal to the oesophagus. *Lancet Gastroenterol Hepatol* 2018;3(4):271-280.
3. Mejia R, Nutman T. Evaluation and differential diagnoses of marked, persistent

eosinophilia. *Semin Hematol.* 2012;49(2): 149-159.
